# Supplementary material
Source: PubMed Central journal article supplement (PMC2002627)
Supplement: plntcell_tpc.107.053736_2.pdf [file plntcell_tpc.107.053736_2.pdf]

## Supplemental Figure 2

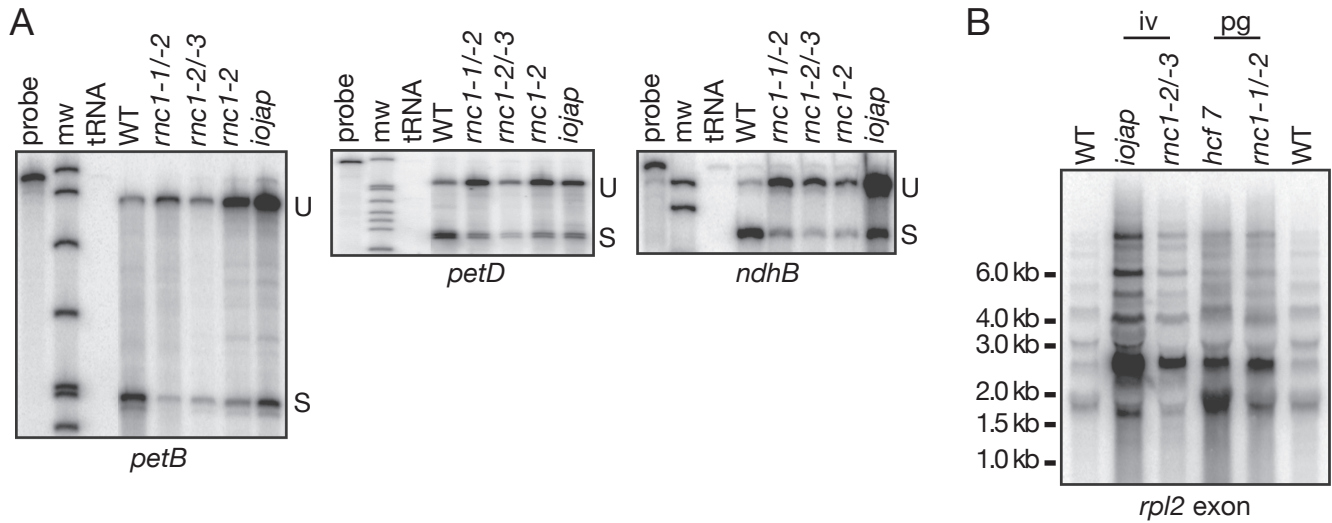

**Supplemental Figure 2.** Additional analyses of plastid RNA metabolism in *rnc1* mutants.

(A) Ribonuclease-protection assays confirming the splicing defects detected by poisoned-primer extension for *petB*, *petD*, and *ndhB*. U- unspliced; S- spliced.

(B) RNA gel blot hybridization showing RNAs that hybridize with a probe specific for an *rpl2* exon.
